# Supplementary material for: A turn-on AIE sensor for nanomolar detection of perrhenate in aqueous media
Source: Royal Society of Chemistry journal article supplement (doi:10.1039/d6ra01192f), 2026-03-26
Supplement: d6ra01192f1.pdf [file d6ra01192f1.pdf]

## Supporting Information

### **A Turn-On AIE Sensor for Nanomolar Detection of Perrhenate in Aqueous Media**

Yan-ni Li, Yan-xin Du, Hao Liu, Yi-jie Zhu, Fan Deng, Qin-feng Xu\*

School of Food Science and Engineering, National Research and Development Center for Goat Dairy Products Processing Technology, Shaanxi University of Science and Technology, Xi'an, Shaanxi 710021, China.

\* Corresponding Authors. Email: [xuqinfeng@sust.edu.cn](mailto:xuqinfeng@sust.edu.cn).



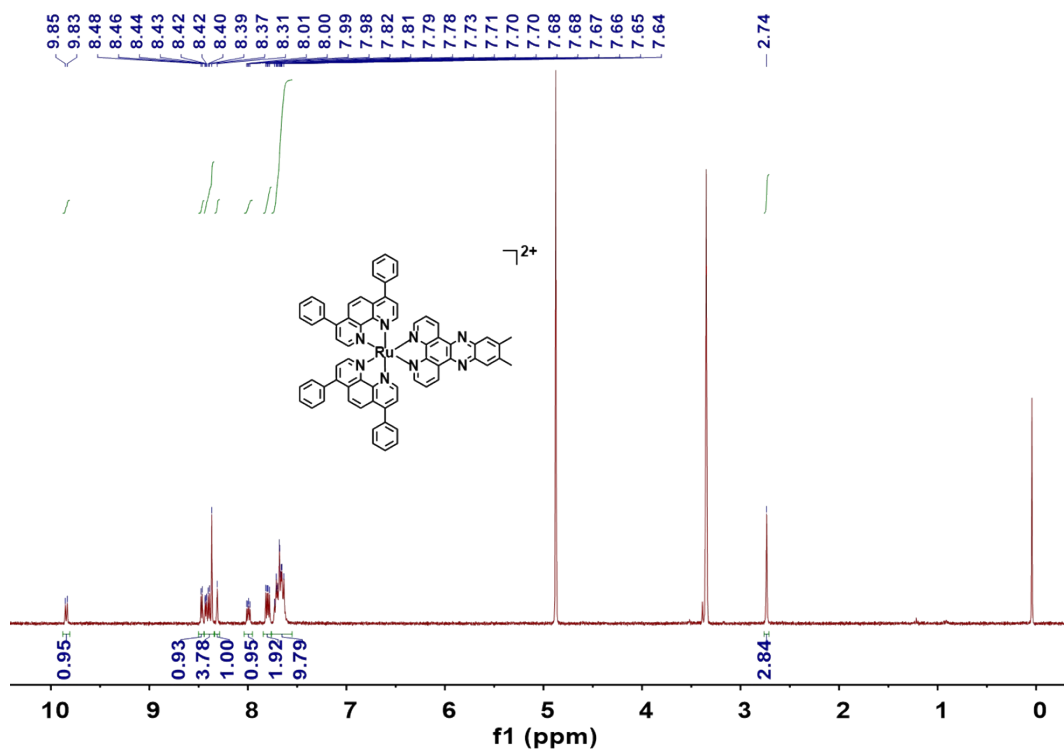

Fig. S3  $^1\text{H}$  NMR spectrum of probe **Ru3** in  $\text{CD}_4\text{O}$ .

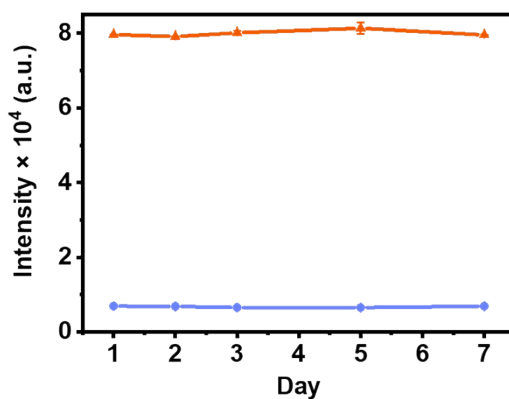

Fig. S4 Stability test of **Ru3** aqueous solution at room temperature over 7 days in the absence and presence of  $\text{ReO}_4^-$ .

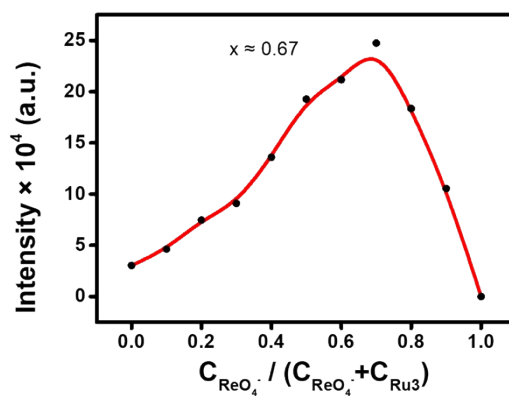

Fig. S5 Job plot of Luminescence intensity of **Ru3** with  $\text{ReO}_4^-$  in water (total concentration:  $50\ \mu\text{M}$ ).

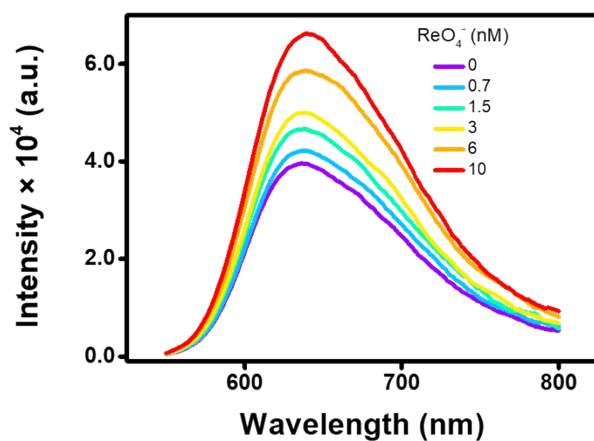

Fig. S6 Luminescence emission spectra of **Ru3** in the presence of different concentrations of  $\text{ReO}_4^-$  with preconcentration.

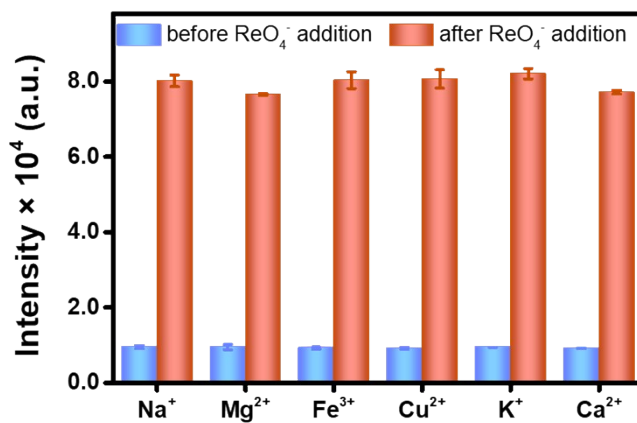

Fig. S7 Luminescence responses of probe **Ru3** in the presence of different cationic analytes.

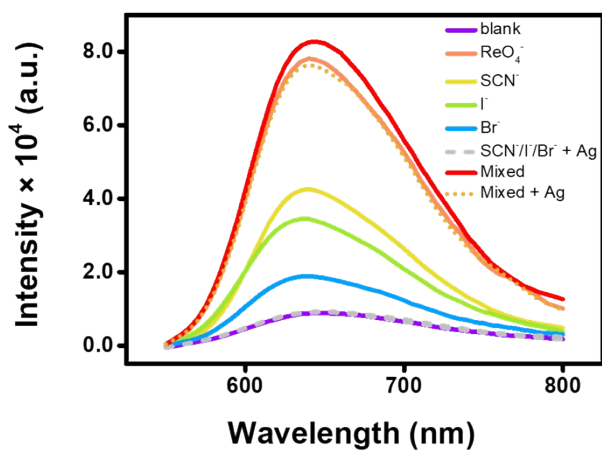

Fig. S8 Luminescence emission spectra of **Ru3** to  $\text{ReO}_4^-$  and other anions without and with treatment of IC-Ag column.

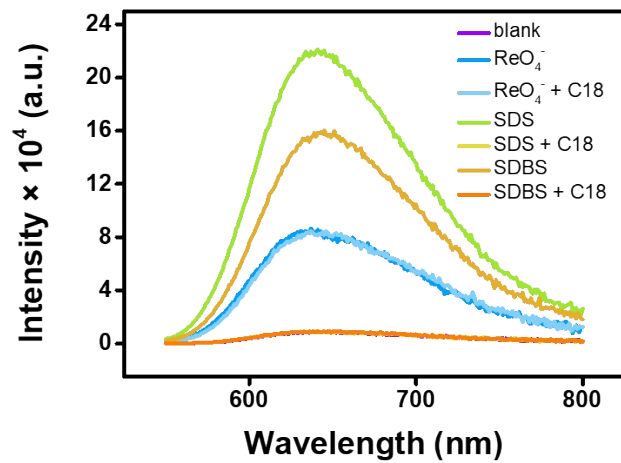

**Fig. S9** Luminescence responses of **Ru3** (20  $\mu\text{M}$ ) toward  $\text{ReO}_4^-$  and other organic compounds (10  $\mu\text{M}$ ) without and with treatment of C18 column.

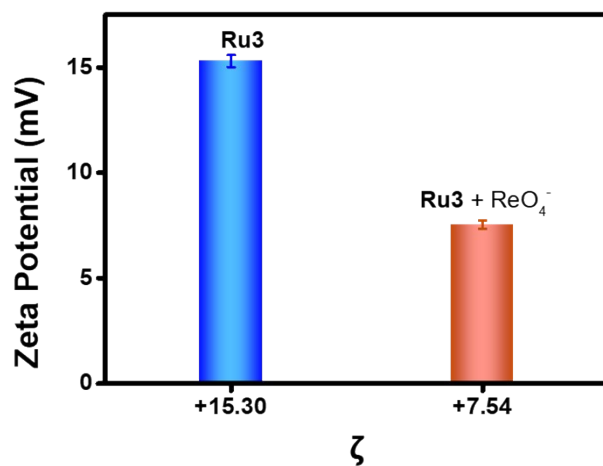

**Fig. S10** Comparative Zeta potential study of **Ru3** in the absence and presence of  $\text{ReO}_4^-$ .

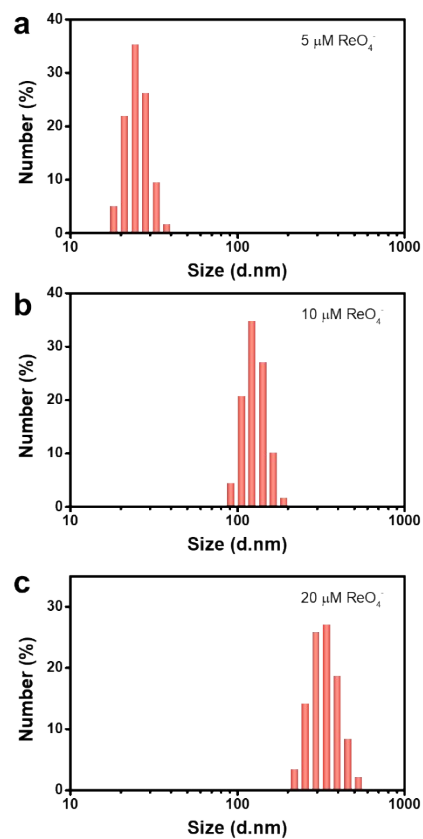

**Fig. S11** DLS profiles of **Ru3** in the presence of different concentrations of  $\text{ReO}_4^-$ : (a)  $5 \mu\text{M}$ , (b)  $10 \mu\text{M}$ , (c)  $20 \mu\text{M}$ .

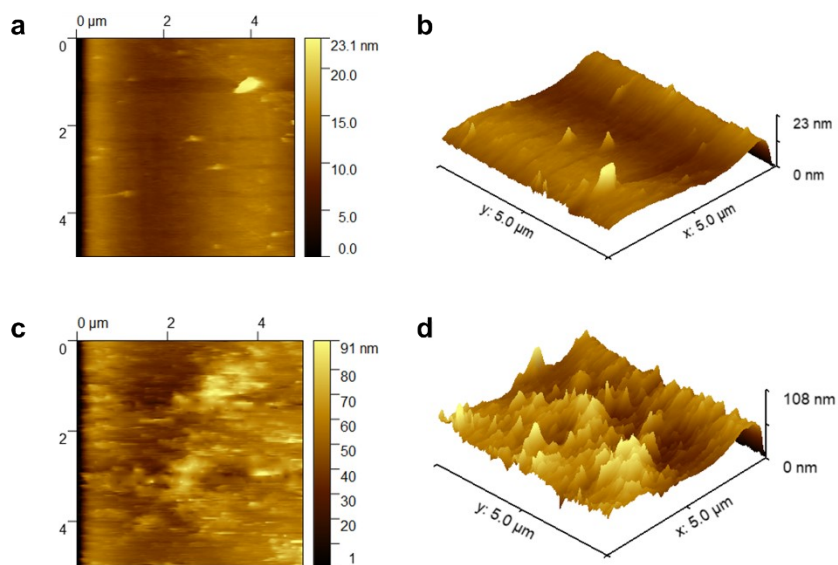

**Fig. S12** AFM images of **Ru3** in the absence and presence of  $\text{ReO}_4^-$ : (a) 2D and (b) 3D image without  $\text{ReO}_4^-$ , (c) 2D and (d) 3D image with  $\text{ReO}_4^-$ .

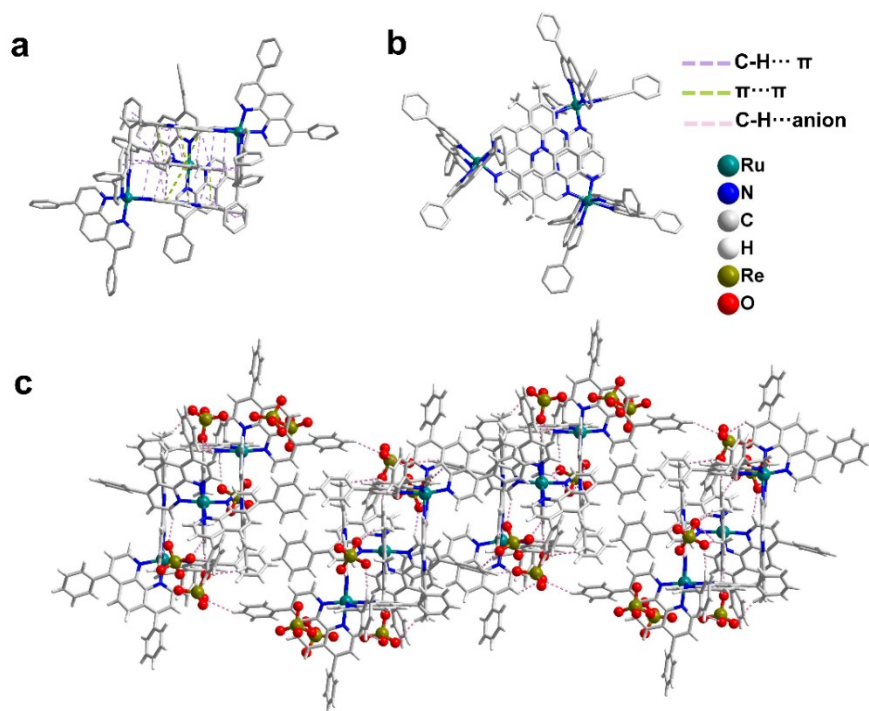

**Fig. S13** (a) Side view and (b) top view of the crystal structure of  $[\text{Ru}_3](\text{ReO}_4)_2$  adduct complexes. Solvent molecules and hydrogen atoms are omitted for clarity. The purple and the green dotted line represent the  $\text{C-H}\cdots\pi$  interaction and the  $\pi\cdots\pi$  interaction in the adjacent molecules of  $\text{Ru}_3$ , respectively; (c) View of the three-dimensional (3D) crystal packing of  $[\text{Ru}_3](\text{ReO}_4)_2$  adduct complexes.

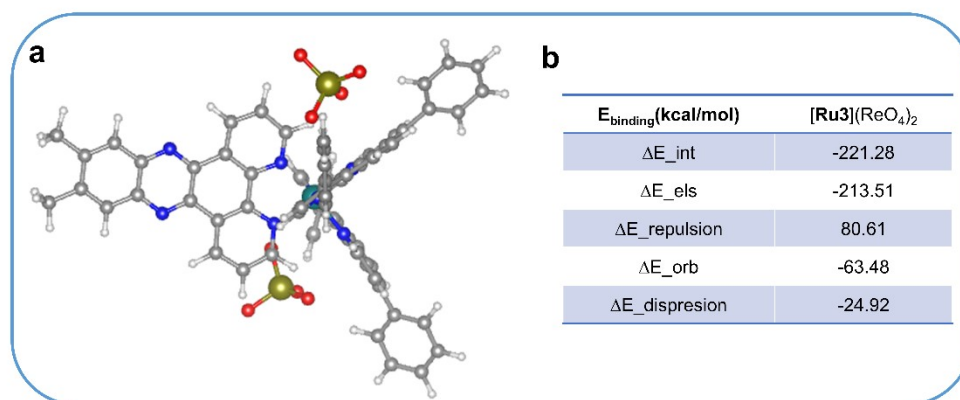

**Fig. S14** (a) The optimized structure of the  $[\text{Ru}_3](\text{ReO}_4)_2$  complex. (b) Energy decomposition analysis of the  $[\text{Ru}_3](\text{ReO}_4)_2$  complex.

## 2. Supplementary Tables

**Table S1.** Sensitivity comparison of the present probe with the recently reported luminescence probes for  $\text{ReO}_4^-$ .

| Detection manner | Materials             | Detection mechanism                           | Solvent                                          | Response time | LOD ( $\mu\text{M}$ ) | Ref. |
|------------------|-----------------------|-----------------------------------------------|--------------------------------------------------|---------------|-----------------------|------|
| turn-off         | CP-16                 | aggregation-induced fluorescence quenching    | water and a chloroform/methanol (1:1) mixture    | -             | 0.58                  | [1]  |
| turn-off         | TJNU-302              | electron transfer                             | $\text{H}_2\text{O}$                             | -             | 90                    | [2]  |
| turn-off         | $\text{Zr}^{4+}$ MOFs | electron transfer                             | $\text{H}_2\text{O}$                             | -             | 0.55                  | [3]  |
| turn-off         | NCU-2                 | ion exchange                                  | $\text{H}_2\text{O}$                             | < 30 s        | 0.067                 | [4]  |
| turn-off         | PMA                   | Photoinduced electron transfer (PET)          | $\text{H}_2\text{O}$                             | -             | 14                    | [5]  |
| turn-off         | MOCNs                 | PET                                           | $\text{H}_2\text{O}$                             | -             | 12.6                  | [6]  |
| turn-off         | BTTA-BDNP             | PET                                           | DMF/ $\text{H}_2\text{O}$                        | < 30 s        | 0.067                 | [7]  |
| turn-off         | TFPM-EP-Br            | PET                                           | $\text{H}_2\text{O}$                             | < 2 s         | 0.033                 | [8]  |
| turn-off         | TpBDOH-AB             | ion exchange                                  | $\text{C}_2\text{H}_5\text{OH}$                  | 2 s           | 1.07                  | [9]  |
| turn-off         | C-CD                  | PET                                           | $\text{H}_2\text{O}$                             | -             | 87                    | [10] |
| turn-off         | $1\text{H}_6^{6+}$    | PET                                           | 0.1 M $\text{CF}_3\text{SO}_3\text{Na}$ , pH = 2 | -             | -                     | [11] |
| turn-off         | ModA                  | hydrogen bond                                 | 20 mM Tris, 50 mM NaCl, pH = 7.6                 | -             | -                     | [12] |
| turn-on          | TPDC-I                | AIE                                           | $\text{H}_2\text{O}$                             | -             | 0.9                   | [13] |
| turn-on          | XB                    | halogen bonding and electrostatic interaction | 10 mM aqueous hepes buffer, pH = 7.4             | -             | -                     | [14] |
| turn-on          | PIC                   | J-aggregation                                 | $\text{H}_2\text{O}$                             | -             | 0.17                  | [15] |
| turn-on          | ThT                   | AIE                                           | $\text{H}_2\text{O}$                             | -             | 260                   | [16] |
| turn-on          | AuO                   | J-aggregation                                 | $\text{H}_2\text{O}$                             | -             | 270                   | [17] |

**Table S1:** (continued)

| Detection manner | Materials                      | Detection mechanism | Solvent          | Response time | LOD ( $\mu\text{M}$ )                             | Ref.      |
|------------------|--------------------------------|---------------------|------------------|---------------|---------------------------------------------------|-----------|
| turn-on          | [Pt(tpy)Br](SbF <sub>6</sub> ) | ion exchange        | H <sub>2</sub> O | 2-5 min       | $2.6 \times 10^{-4}$                              | [18]      |
| turn-on          | Ir-PAF                         | ion exchange        | pH = 4           | -             | 2.07                                              | [19]      |
| turn-on          | Ru(II) complex                 | halogen-bond        | acetonitrile     | -             | -                                                 | [20]      |
| turn-on          | <b>Ru1</b>                     | AIE                 | H <sub>2</sub> O | < 1 s         | 0.718                                             |           |
| turn-on          | <b>Ru2</b>                     | AIE                 | H <sub>2</sub> O | < 1 s         | 0.026                                             |           |
| turn-on          | <b>Ru3</b>                     | AIE                 | H <sub>2</sub> O | < 1 s         | 0.003                                             | this work |
| turn-on          | <b>Ru3</b>                     | AIE                 | H <sub>2</sub> O | < 1 s         | $1.3 \times 10^{-4}$<br>(after pre-concentration) |           |

**Table S2.** Composition of simulated Hanford LAW melter recycle stream.

| Anion                         | Concentration(mol/L)  | Anion: TcO <sub>4</sub> <sup>-</sup> molar ratio |
|-------------------------------|-----------------------|--------------------------------------------------|
| TcO <sub>4</sub> <sup>-</sup> | $1.94 \times 10^{-4}$ | 1.0                                              |
| NO <sub>3</sub> <sup>-</sup>  | $6.07 \times 10^{-2}$ | 314                                              |
| Cl <sup>-</sup>               | $6.39 \times 10^{-2}$ | 330                                              |
| NO <sub>2</sub> <sup>-</sup>  | $1.69 \times 10^{-1}$ | 873                                              |
| SO <sub>4</sub> <sup>2-</sup> | $6.64 \times 10^{-6}$ | 0.0343                                           |
| CO <sub>3</sub> <sup>2-</sup> | $4.30 \times 10^{-5}$ | 0.222                                            |

**Table S3.** Summary of X-Ray Crystallographic Data.

| Complexes                                 | [Ru3](ReO4) <sub>2</sub>                                                                          |
|-------------------------------------------|---------------------------------------------------------------------------------------------------|
| Empirical formula                         | C <sub>204</sub> H <sub>138</sub> N <sub>24</sub> O <sub>24</sub> Re <sub>6</sub> Ru <sub>3</sub> |
| Formula weight                            | 4729.79                                                                                           |
| Temperature/K                             | 193.00                                                                                            |
| Crystal system                            | monoclinic                                                                                        |
| Space group                               | P2 <sub>1</sub> /c                                                                                |
| Unit cell dimensions                      | a = 31.456(17) Å, α = 90°<br>b = 24.499(13) Å, β = 106.554(9)°<br>c = 29.263(16) Å, γ = 90°       |
| Volume/Å <sup>3</sup>                     | 21616(20)                                                                                         |
| Z                                         | 4                                                                                                 |
| ρ <sub>calc</sub> /cm <sup>3</sup>        | 1.453                                                                                             |
| μ/mm <sup>-1</sup>                        | 3.612                                                                                             |
| F(000)                                    | 9216.0                                                                                            |
| Crystal size/mm <sup>3</sup>              | 0.12 × 0.1 × 0.09                                                                                 |
| Radiation                                 | MoKα (λ = 0.71073)                                                                                |
| 2θ range for data collection/°            | 3.906 to 49.424                                                                                   |
| Index ranges                              | -37 ≤ h ≤ 37, -28 ≤ k ≤ 28, -34 ≤ l ≤ 34                                                          |
| Goodness-of-fit on F <sup>2</sup>         | 1.230                                                                                             |
| Final R indexes [I ≥ 2σ (I)]              | R <sub>1</sub> = 0.1494, wR <sub>2</sub> = 0.3459                                                 |
| Final R indexes<br>[all data]             | R <sub>1</sub> = 0.1774, wR <sub>2</sub> = 0.3604                                                 |
| Largest diff. peak/hole /eÅ <sup>-3</sup> | 1.76/-1.71                                                                                        |

### 3. References

1. A. Hazra, C. Ghosh, F. Banerjee and S. K. Samanta, Highly efficient main-chain cationic polyelectrolytes for selective sensing of permanganate, perrhenate, and heparin. *ACS Appl. Polym. Mater.*, 2024, **6**, 6540-6551.
2. C.-P. Li, H. Zhou, J. Chen, J.-J. Wang, M. Du and W. Zhou, A highly efficient coordination polymer for selective trapping and sensing of perrhenate/pertechnetate. *ACS Appl. Mater. Interfaces*, 2020, **12**, 15246-15254.
3. S. Rapti, S. A. Diamantis, A. Dafnomili, A. Pournara, E. Skliri, G. S. Armatas, A. C. Tsipis, I. Spanopoulos, C. D. Malliakas and M. G. Kanatzidis, Exceptional  $\text{TcO}_4^-$  sorption capacity and highly efficient  $\text{ReO}_4^-$  luminescence sensing by  $\text{Zr}^{4+}$  MOFs. *J. Mater. Chem. A*, 2018, **6**, 20813-20821.
4. Q.-H. Hu, X. Gao, Y.-Z. Shi, R.-P. Liang, L. Zhang, S. Lin and J.-D. Qiu, Tailor-made multiple interpenetrated metal-organic framework for selective detection and adsorption of  $\text{ReO}_4^-$ . *Anal. Chem.*, 2022, **94**, 16864-16870.
5. G. Singh, S. P. Pandey and P. K. Singh, A dual intensity and lifetime based fluorescence sensor for perrhenate anion. *Sens. Actuators, B*, 2021, **330**, 129346.
6. S. Khan and S. K. Mandal, Luminescent 2D pillared-bilayer metal-organic coordination networks for selective sensing of  $\text{ReO}_4^-$  in water. *ACS Appl. Mater. Interfaces*, 2021, **13**, 45465-45474.
7. X.-R. Chen, C.-R. Zhang, X. Liu, R.-P. Liang and J.-D. Qiu, Ionic covalent organic framework for selective detection and adsorption of  $\text{TcO}_4^-/\text{ReO}_4^-$ . *Chem. Commun.*, 2023, **59**, 9521-9524.
8. J.-X. Qi, C.-R. Zhang, X.-J. Chen, S.-M. Yi, C.-P. Niu, J.-L. Liu, L. Zhang, R.-P. Liang and J.-D. Qiu, 3D ionic olefin-linked conjugated microporous polymers for selective detection and removal of  $\text{TcO}_4^-/\text{ReO}_4^-$  from wastewater. *Anal. Chem.*, 2022, **94**, 10850-10856.
9. S.-M. Yi, C.-R. Zhang, W. Jiang, X. Liu, C.-P. Niu, J.-X. Qi, X.-J. Chen, R.-P. Liang and J.-D. Qiu, Ionic liquid modified covalent organic frameworks for efficient detection and adsorption of  $\text{ReO}_4^-/\text{TcO}_4^-$ . *J. Environ. Chem. Eng.*, 2022, **10**, 107666.
10. M. R. Choi and B. Lee, Synthesis of cationic carbon quantum dot-based dual emission fluorescence sensor for detecting perrhenate anions in aqueous solutions. *Opt. Mater.*, 2022, **134**, 113190.
11. V. Amendola, G. Bergamaschi, M. Boiocchi, R. Alberto and H. Braband, Fluorescent sensing of  $^{99}\text{Tc}$  pertechnetate in water. *Chem. Sci.*, 2014, **5**, 1820-1826.
12. B. P. Aryal, P. Brugarolas and C. He, Binding of  $\text{ReO}_4^-$  with an engineered  $\text{MoO}_4^{2-}$ -binding protein: towards a new approach in radiopharmaceutical applications. *JBIC, J. Biol. Inorg. Chem.*, 2012, **17**, 97-106.
13. H.-L. Xu, J.-Y. Zhang, J.-S. Su, L. Li, H.-Y. Cao, G.-L. Li and Z.-H. Ni, Efficient capture and dual-modal fluorescence detection of  $\text{ReO}_4^-$  using a TPE-based pyridinium network. *Dyes Pigm.*, 2025, **235**, 112579.
14. J. Y. Lim and P. D. Beer, Superior perrhenate anion recognition in water by a halogen bonding acyclic receptor. *Chem. Commun.*, 2015, **51**, 3686-3688.
15. S. P. Pandey, A. M. Desai and P. K. Singh, A highly sensitive fluorescence "turn on" detection of perrhenate Anion, a non-radioactive surrogate of hazardous pertechnetate anion. *Sens. Actuators, B*, 2020, **323**, 128675.

16. A. M. Desai and P. K. Singh, An ultrafast molecular-rotor-based fluorescent turn-on sensor for the perrhenate anion in aqueous solution. *Chem. - Eur. J.*, 2019, **25**, 2035-2042.
17. A. M. Desai and P. K. Singh, Ratiometric fluorescence turn-on sensing of perrhenate anion, a non-radioactive surrogate of hazardous pertechnetate, in aqueous solution. *Sens. Actuators, B*, 2018, **277**, 205-209.
18. S. Chatterjee, A. E. Norton, M. K. Edwards, J. M. Peterson, S. D. Taylor, S. A. Bryan, A. Andersen, N. Govind, T. E. Albrecht-Schmitt and W. B. Connick, Highly selective colorimetric and luminescence response of a square-planar platinum(II) terpyridyl complex to aqueous  $\text{TcO}_4^-$ . *Inorg. Chem.*, 2015, **54**, 9914-9923.
19. D.-Y. Xu, L. Chen, X. Dai, B.-Y. Li, Y.-X. Wang, W. Liu, J. Li, Y. Tao, Y.-L. Wang, Y. Liu, G.-W. Peng, R.-H. Zhou, Z.-F. Chai, S.-A. Wang, A porous aromatic framework functionalized with luminescent iridium(III) organometallic complexes for turn-on sensing of  $^{99}\text{TcO}_4^-$ . *ACS Appl. Mater. Interfaces*, 2020, **12**, 15288-15297.
20. S. Mondal, A. Rashid and P. Ghosh, A pentafluorophenyl functionalized RuII-probe having halogen bond center toward recognition and sensing of perrhenate and dihydrogen phosphate. *J. Organomet. Chem.*, 2021, **952**, 122027.
